# Supplementary material for: Admissions in the age of AI: detecting AI-generated application materials in higher education
Source: PubMed Central journal article supplement — Sci Rep. 2024 Nov 2;14:26411. doi: 10.1038/s41598-024-77847-z (PMC11531587; doi:10.1038/s41598-024-77847-z), 2024-11-02
Supplement: 41598_2024_77847_MOESM1_ESM.pdf [file 41598_2024_77847_MOESM1_ESM.pdf]

## Sample SOIs and LORs Generated by GPT 3.5 API

### SOI Prompt #1

*Write a statement of purpose for a master's in Data Science at Fordham University. My undergrad is in Mathematics, my GPA is 3.45, and I know python, java, matlab, software, calculus, linear algebra.*

I am writing to express my strong interest in the Master's in Data Science program at Fordham University. With a solid academic foundation in Mathematics and a keen passion for data analysis, I am excited to embark on a journey of advanced learning and research in this rapidly evolving field.

My undergraduate experience in Mathematics has provided me with a robust analytical skillset, fostering a deep appreciation for the power of data-driven insights. Throughout my academic journey, I have consistently demonstrated a commitment to excellence, as reflected in my GPA of 3.45. My coursework has equipped me with a strong mathematical background, particularly in calculus and linear algebra, which I believe are fundamental in understanding the intricacies of data science.

Beyond my academic achievements, I have actively honed my programming skills. Proficiency in Python, Java, and MATLAB has allowed me to explore data manipulation, analysis, and visualization, giving me a hands-on understanding of the tools crucial to data scientists.

What draws me to Fordham University is not only its distinguished faculty and comprehensive curriculum but also the institution's commitment to fostering a collaborative and inclusive learning environment. I am particularly excited about the opportunities to engage with like-minded peers and renowned faculty members who share my passion for data science.

Furthermore, I am inspired by the prospect of contributing to cutting-edge research and practical applications in data science during my time at Fordham. I look forward to working on projects that not only challenge me intellectually but also have a real-world impact.

In conclusion, my academic background, technical skills, and unwavering enthusiasm for data science make me a strong candidate for the Master's in Data Science program at Fordham University. I am eager to embark on this transformative educational journey, where I can leverage my knowledge and skills to push the boundaries of what is possible in the field of data science.

Thank you for considering my application. I eagerly anticipate the opportunity to join the vibrant academic community at Fordham University and contribute to the advancement of data science.

## SOI Prompt #2

*Assume you are applying for a graduate program in Data Science at Fordham University. Write a statement of purpose telling a story that explains your reasons for pursuing this program, and how your undergraduate major in Computer Science, and knowledge (java, c++, database, software) have prepared you for success in this mater's program.*

I am writing to convey my heartfelt passion for the Master's in Data Science program at Fordham University and to share the story that has led me to this pivotal juncture in my academic journey.

Growing up in a small town, I was always fascinated by the intricate dance of data, algorithms, and technology. This curiosity led me to pursue a Bachelor's degree in Computer Science, where I delved into the realms of Java, C++, databases, and software engineering. Throughout my undergraduate years, I discovered the power of translating data into insights that fuel informed decisions, and my fascination with data science was born.

One particular experience stands out as the turning point on my path to data science. During an internship at a local tech company, I was tasked with optimizing a database system that was struggling to handle the ever-increasing volume of data. Through my relentless determination, I not only improved the database's performance but also unearthed valuable patterns within the data that had previously gone unnoticed. This experience ignited a fire within me and opened my eyes to the transformative potential of data science in the real world.

My undergraduate studies laid a strong foundation in computer science, equipping me with the technical prowess necessary to excel in data science. Yet, I yearned for more. I yearned for the opportunity to unravel the complexities of data, to harness its potential for innovation, and to drive meaningful change through analytics.

Fordham University's Master's in Data Science program emerged as the perfect platform to transform my aspirations into reality. The program's distinguished faculty and comprehensive curriculum offer an unparalleled opportunity to immerse myself in advanced data science concepts, cutting-edge research, and practical applications. What sets Fordham apart, however, is its commitment to nurturing a collaborative and inclusive learning environment—a place where passionate individuals from diverse backgrounds come together to explore the boundless possibilities of data.

I am excited about the prospect of working alongside esteemed professors and fellow students who share my fervor for data science. I look forward to engaging in research that pushes the boundaries of our understanding and applying data-driven insights to solve real-world challenges.

In conclusion, my journey from a small town to a Bachelor's degree in Computer Science has fueled my passion for data science. I am confident that the knowledge and technical skills I have acquired, coupled with the transformative education I am poised to receive at Fordham University, will empower me to make a meaningful impact in the world of data science.

Thank you for considering my application. I am genuinely thrilled at the prospect of joining the vibrant academic community at Fordham University, where I can contribute to the ever-evolving field of data science and, in turn, help shape a brighter future.

## LOR Prompt #1

**Note: To protect privacy, sensitive information such as student names and recommender affiliations has been redacted from both the AI-generated and human-authored LORs.**

*Please write a recommendation letter for 931000356 who want to pursue his master degree in MSDS at Fordham University. Please describe 931000356 has consistently demonstrated his hard work, creativity, and dedication in his role, and our relationship is Work, The statement should have around 343 words.*

I am writing to highly recommend \_\_\_ for admission to the Master of Science in Data Science (MSDS) program at Fordham University. I have had the privilege of working closely with \_\_\_ and have been consistently impressed by his unwavering dedication, outstanding creativity, and strong work ethic.

During his time at \_\_\_, has consistently demonstrated his commitment to excellence. His role as a has required not only technical expertise but also the ability to think critically and solve complex problems. \_\_\_ has excelled in these aspects, consistently delivering high-quality results on challenging projects.

One of \_\_\_'s standout qualities is his creativity. He has a remarkable ability to approach problems from unique angles and generate innovative solutions. His creative thinking has been a valuable asset to our team. \_\_\_'s contributions have consistently exceeded our expectations, and his creativity is an asset that sets him apart.

In addition to his technical and creative skills, \_\_\_ is a dedicated and hardworking individual. He has shown a remarkable level of commitment to his responsibilities, often going above and beyond to meet project deadlines and deliver results that exceed our clients' expectations. His work ethic is truly commendable and reflects his strong determination to excel in his field.

I believe that \_\_\_ possesses the qualities and potential to thrive in the MSDS program at Fordham University. His passion for data science, coupled with his strong analytical skills and dedication, make him an ideal candidate for your program. I have every confidence that he will make significant contributions to the academic community and excel in the program.

In conclusion, I wholeheartedly recommend \_\_\_ for admission to the MSDS program at Fordham University. His consistent hard work, creativity, and dedication make him an outstanding candidate, and I am confident that he will continue to achieve excellence in his academic pursuits.

If you have any questions or require further information, please feel free to contact me at \_\_\_. I am enthusiastic about \_\_\_'s potential and am certain that he will make the most of this educational opportunity.

Thank you for considering his application. I have no doubt that he will make a valuable addition to your program.

## LOR Prompt #2

**Note: To protect privacy, sensitive information such as student names and recommender affiliations has been redacted from both the AI-generated and human-authored LORs.**

*Please write a recommendation letter for 722000185 who desire a master degree in MSCS at Fordham University. Please describe his passion for machine learning, and performance and our relationship is Academic, The statement should have around 400 words.*

I am writing to wholeheartedly recommend \_\_\_ for admission to the Master of Science in Computer Science program at Fordham University. Having had the privilege of being \_\_\_'s academic mentor, I am confident in stating that he is a highly motivated and exceptionally talented individual with a genuine passion for machine learning.

Throughout my time working closely with \_\_\_, it has become evident that he possesses a remarkable dedication to the field of computer science, particularly in the realm of machine learning. He consistently demonstrates a deep intellectual curiosity and enthusiasm for tackling complex problems in this domain. His commitment to understanding the intricate nuances of machine learning algorithms, as well as his remarkable ability to apply this knowledge to practical challenges, has been truly impressive.

In our academic journey together, \_\_\_ has consistently displayed exceptional performance. His coursework not only reflects a strong foundation in computer science but also showcases his exceptional analytical and problem-solving skills, which are particularly critical in the field of machine learning. He has excelled in challenging courses, demonstrating a keen aptitude for advanced topics such as neural networks, deep learning, and natural language processing.

Beyond his academic achievements, \_\_\_ has actively engaged in research and practical projects related to machine learning. His contributions to ongoing research in our department have been invaluable, and he has consistently exhibited a high degree of creativity when approaching research questions. \_\_\_'s work has been instrumental in several research publications, underscoring his ability to make meaningful contributions to the field.

What truly sets \_\_\_ apart is his collaborative spirit and commitment to sharing knowledge with peers. He actively participates in group discussions, mentors fellow students, and contributes to a positive learning environment. His willingness to collaborate and help others reflects his strong interpersonal skills and leadership qualities.

In conclusion, I wholeheartedly endorse \_\_\_'s application to the Master of Science in Computer Science program at Fordham University. He possesses the intellectual acumen, passion, and work ethic that will undoubtedly contribute to his continued success in the field of computer science and machine learning. I am confident that he will excel academically and bring valuable perspectives to the program.

Please do not hesitate to contact me if you require any further information or have questions regarding this recommendation.
